# Supplementary material
Source: PubMed Central journal article supplement (PMC3205940)
Supplement: NIHMS323112-supplement-supplement_1.pdf [file NIHMS323112-supplement-supplement_1.pdf]

22. Klein H, Elifson KW, Sterk CE. "At risk" women who think that they have no chance of getting HIV: self-assessed perceived risks. *Women Health*. 2003;38:47-63.
23. Adams AL, Becker TM, Lapidus JA, et al. HIV infection risk, behaviors, and attitudes about testing: are perceptions changing? *Sex Transm Dis*. 2003;30:764-768.
24. Fichtner RR, Wolitski RJ, Johnson WD, et al. Influence of perceived and assessed risk on STD clinic clients' acceptance of HIV testing, return for test results, and HIV serostatus. *Psychol Health Med*. 1996;1:83-98.
25. Gerrard M, Gibbons FX, Bushman BJ. Relation between perceived vulnerability to HIV and precautionary sexual behavior. *Psychol Bull*. 1996;119:390-409.
26. Amadora-Nolasco F, Alburo RE, Aguilar EJT, et al. Knowledge, perception of risk for HIV, and condom use: a comparison of registered and freelance female sex workers in Cebu City, Philippines. *AIDS Behav*. 2001;5:319-330.

**Figure.**

Eligibility assessment and enrollment flow diagram.

**Table E1.**

Demographic characteristics and HIV testing history by study arm assignment.

|                                                    | All<br>Participants | Intervention<br>Arm | No<br>Intervention<br>Arm | <i>P</i> Value* |
|----------------------------------------------------|---------------------|---------------------|---------------------------|-----------------|
| <b>Demographic characteristics</b>                 | n=571               | n=286               | n=285                     |                 |
| <b>Median age, y<br/>(interquartile<br/>range)</b> | 33 (22–43)          | 29 (23–44)          | 29 (22–42)                |                 |
| <b>Sex</b>                                         |                     |                     |                           | .76             |
| Female                                             | 62.2                | 61.5                | 62.8                      |                 |
| Male                                               | 37.8                | 38.5                | 37.2                      |                 |
| <b>Ethnicity/race</b>                              |                     |                     |                           | .17             |
| White, Non-<br>Hispanic                            | 62.4                | 60.5                | 64.2                      |                 |
| White,<br>Hispanic                                 | 14.9                | 15.7                | 14.0                      |                 |
| Black, African<br>American                         | 13.8                | 13.6                | 14.0                      |                 |
| Black,<br>Hispanic                                 | 6.3                 | 6.6                 | 6.0                       |                 |
| Asian/Middle<br>Eastern                            | 1.9                 | 3.2                 | 0.7                       |                 |
| Native<br>Hawaiian/other<br>Pacific<br>Islander    | 0.2                 | 0.4                 | 0.0                       |                 |
| American<br>Indian/Alaskan<br>Native               | 0.5                 | 0.0                 | 1.1                       |                 |
| <b>Partner status</b>                              |                     |                     |                           | .72             |
| Married                                            | 22.4                | 22.4                | 22.5                      |                 |
| Divorced                                           | 10.5                | 12.2                | 8.8                       |                 |
| Widowed                                            | 0.7                 | 0.7                 | 0.7                       |                 |
| Separated                                          | 3.2                 | 2.8                 | 3.5                       |                 |
| Never married                                      | 48.3                | 48.6                | 48.1                      |                 |
| Unmarried<br>couple                                | 14.9                | 13.3                | 16.5                      |                 |
| <b>Insurance<br/>status</b>                        |                     |                     |                           | .56             |

|                                                           |       |       |       |     |
|-----------------------------------------------------------|-------|-------|-------|-----|
| Private                                                   | 41.3  | 42.7  | 40.0  |     |
| Governmental                                              | 36.3  | 33.6  | 39.0  |     |
| Private and governmental                                  | 0.7   | 0.7   | 0.7   |     |
| None                                                      | 21.5  | 23.1  | 20.0  |     |
| Don't know                                                | 0.2   | 0.0   | 0.4   |     |
| <b>Years of formal education, grade</b>                   |       |       |       | .38 |
| 1-8                                                       | 3.3   | 3.5   | 3.2   |     |
| 9-11                                                      | 15.8  | 12.9  | 18.6  |     |
| 12 or GED                                                 | 29.3  | 31.8  | 26.7  |     |
| College 1-3 y                                             | 31.5  | 31.1  | 31.9  |     |
| College 4 y/graduate school                               | 20.0  | 20.3  | 19.7  |     |
| Don't know                                                | 0.2   | 0.4   | 0     |     |
| <b>HIV testing history</b>                                |       |       |       |     |
| <b>Ever tested for HIV (not part of a blood donation)</b> | n=571 | n=286 | n=285 | .59 |
| Previously                                                | 32.4  | 67.5  | 66.3  |     |
| Never                                                     | 66.9  | 31.5  | 33.3  |     |
| Don't know                                                | 0.7   | 1.1   | 0.4   |     |
| <b>Time elapsed since last HIV test</b>                   | n=382 | n=193 | n=189 | .76 |
| >5 y                                                      | 22.0  | 23.8  | 20.1  |     |
| >2 y but ?5 y                                             | 18.9  | 20.7  | 16.9  |     |
| >1 y but ?2 y                                             | 18.6  | 17.1  | 20.1  |     |
| >6 mo but ?1 y                                            | 13.9  | 12.4  | 15.3  |     |
| ?6 mo                                                     | 25.4  | 24.9  | 25.9  |     |
| Don't know                                                | 1.3   | 1.0   | 1.6   |     |
| <b>Ever donated blood</b>                                 | n=571 | n=286 | n=285 | .53 |
| Yes                                                       | 40.5  | 40.2  | 40.7  |     |
| No                                                        | 59.2  | 59.8  | 58.6  |     |

|                                               |       |       |       |      |
|-----------------------------------------------|-------|-------|-------|------|
| Don't know                                    | 0.3   | 0.0   | 0.7   |      |
| <b>Time elapsed since last blood donation</b> | n=231 | n=115 | n=116 | .12  |
| >5 y                                          | 43.3  | 43.5  | 43.1  |      |
| >2 y but ?5 y                                 | 23.8  | 24.4  | 23.3  |      |
| >1 y but ?2 y                                 | 11.3  | 7.0   | 15.5  |      |
| >6 mo but ?1 y                                | 8.2   | 7.8   | 8.6   |      |
| ?6 mo                                         | 13.0  | 17.4  | 8.6   |      |
| Don't know                                    | 0.4   | 0.0   | 0.9   |      |
| <b>History of any HIV test</b>                | n=571 | n=286 | n=285 | 1.00 |
| Tested, but not part of a blood donation      | 40.3  | 40.9  | 39.7  |      |
| Tested as part of a blood donation            | 13.8  | 13.6  | 14.0  |      |
| Tested and donated blood                      | 26.6  | 26.6  | 26.7  |      |
| No known HIV test                             | 18.9  | 18.5  | 19.3  |      |
| Don't know                                    | 0.4   | 0.4   | 0.4   |      |

*GED*, General equivalency diploma.

\**P* values reflect comparison of those randomly assigned to the 2 study arms.

**Table E2.**

Reported HIV risk and self-perceived HIV risk by study arm and sex.

|                                           | Women                      |                               | <i>P</i> Value | Men                           |                               | <i>P</i> Value |
|-------------------------------------------|----------------------------|-------------------------------|----------------|-------------------------------|-------------------------------|----------------|
|                                           | Interventio<br>n, %, n=175 | No Interventio<br>n, %, n=178 |                | Interventio<br>n, %2<br>n=108 | No Interventio<br>n, %, n=105 |                |
| <b>Reported HIV risk score, quartiles</b> |                            |                               | .14            |                               |                               | .36            |

|                                          |      |      |     |      |      |
|------------------------------------------|------|------|-----|------|------|
| 1                                        | 12.6 | 16.3 |     | 28.7 | 35.2 |
| 2                                        | 38.3 | 31.4 |     | 30.6 | 22.9 |
| 3                                        | 32.0 | 27.0 |     | 14.8 | 10.5 |
| 4                                        | 17.1 | 25.3 |     | 25.9 | 31.4 |
| <b>Change in self-perceived HIV risk</b> |      |      | .43 |      | .34  |
| Decrease                                 | 5.7  | 6.7  |     | 10.2 | 8.6  |
| No change                                | 77.1 | 80.9 |     | 74.1 | 81.9 |
| Increase                                 | 17.1 | 12.4 |     | 15.7 | 9.5  |

**Table 1.**

Uptake in HIV screening according to reported HIV risk and self-perceived HIV risk by study arm and sex.

|                                           | Women, No. (%) |              |                 | Men, No. (%) |              |                 |
|-------------------------------------------|----------------|--------------|-----------------|--------------|--------------|-----------------|
|                                           | All Women      | Intervention | No Intervention | All Men      | Intervention | No Intervention |
| <b>Reported HIV risk score, quartiles</b> |                |              |                 |              |              |                 |
| 1                                         | 51 (52.9)      | 22 (63.6)    | 29 (44.8)       | 68 (52.9)    | 31 (48.4)    | 37 (56.8)       |
| 2                                         | 123 (45.5)     | 67 (46.3)    | 56 (44.6)       | 57 (41.1)    | 33 (33.3)    | 24 (54.2)       |
| 3                                         | 104 (58.7)     | 56 (64.3)    | 48 (52.1)       | 27 (48.2)    | 16 (62.5)    | 11 (27.3)       |
| 4                                         | 75 (66.7)      | 30 (60.0)    | 45 (71.1)       | 61 (70.5)    | 28 (64.3)    | 33 (75.8)       |
